# Supplementary material
Source: Springer Nature journal article supplement (https://www.springermedizin.de/resource/supplementary/13046_2014_779_MOESM7_ESM.pdf/9662930)

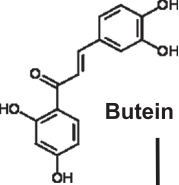

**Butein**

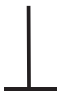

**ROS**

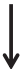

**AKT**

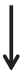

**Breast cancer growth**

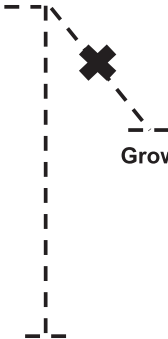

**Growth of luminal HER2<sup>+</sup>**

Supplement: MOESM7 [file 9662930]
